# Supplementary material for: Tissue paper assisted spray ionization mass spectrometry
Source: Royal Society of Chemistry journal article supplement (doi:10.1039/c5ra17878a), 2015-01-01
Supplement: c5ra17878a2.pdf [file c5ra17878a2.pdf]

## Tissue Paper Assisted Spray Ionization Mass Spectrometry

Anil Kumar Meher and Yu-Chie Chen\*

Department of Applied Chemistry, National Chiao Tung University, Hsinchu 300, Taiwan

\*E-mail: [yuchie@mail.nctu.edu.tw](mailto:yuchie@mail.nctu.edu.tw)

### Electronic Supplementary Information

#### Additional figure

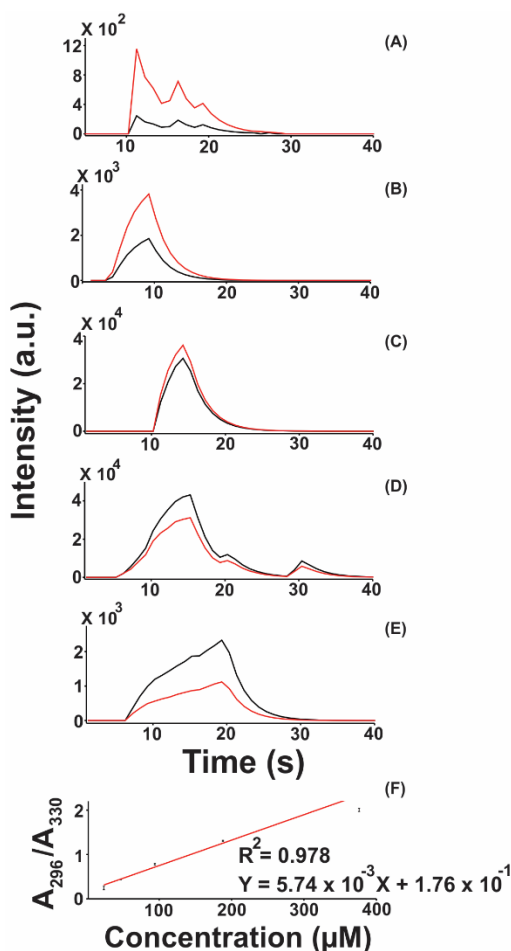

**Figure S1.** Representative EICs of the ions at  $m/z$  296 (black) and 330 (red) obtained from the samples containing hydrochlorothiazide with the concentrations of (A) 23.51  $\mu\text{M}$ , (B) 47.02  $\mu\text{M}$ , (C) 94.04  $\mu\text{M}$ , (D) 188.08  $\mu\text{M}$ , and (E) 376.16  $\mu\text{M}$ . Hydroflumethiazide (41.25 mM, 10  $\mu\text{L}$ ) was spiked to these hydrochlorothiazide samples (1 mL) as the internal standard. Methanol and deionized water (50:50, v/v) was used to prepare the samples. The sample (10  $\mu\text{L}$ ) was deposited on a piece of paper for MS analysis. (F) Plot obtained by plotting the ratio of the peak area at  $m/z$  296 ( $A_{296}$ ) to the peak area at  $m/z$  330 ( $A_{330}$ ) versus the concentration of arginine. Three replicates were conducted for each sample.
